# Supplementary material for: Lanthanide complex-functionalized polyhedral oligomeric silsesquioxane with multicolor emission covered from 450 nm to 1700 nm
Source: Royal Society of Chemistry journal article supplement (doi:10.1039/c5nj02105g), 2015-10-23
Supplement: c5nj02105g1.pdf [file c5nj02105g1.pdf]

## Supporting information

### **Lanthanide complexes-functionalized polyhedral oligomeric silsesquioxane with multicolor emission covered from 450 nm to 1700 nm**

**Lining Sun,\*<sup>a</sup> Ying Liu,<sup>a</sup> Song Dang,<sup>b</sup> Zhuyi Wang,<sup>a</sup> Jinliang Liu,<sup>a</sup> Jifang Fu<sup>a</sup>  
and Liyi Shi\*<sup>a</sup>**

<sup>a</sup> Research Center of Nano Science and Technology, and School of Material Science and Engineering, Shanghai University, Shanghai 200444, P. R. China. E-mail: [lnsun@shu.edu.cn](mailto:lnsun@shu.edu.cn) (L. N. Sun); [shiliyi@shu.edu.cn](mailto:shiliyi@shu.edu.cn) (L. Y. Shi)

<sup>b</sup> State Key Laboratory of Rare Earth Resource Utilization, Changchun Institute of Applied Chemistry, Chinese Academy of Sciences, Changchun 130022, P. R. China.

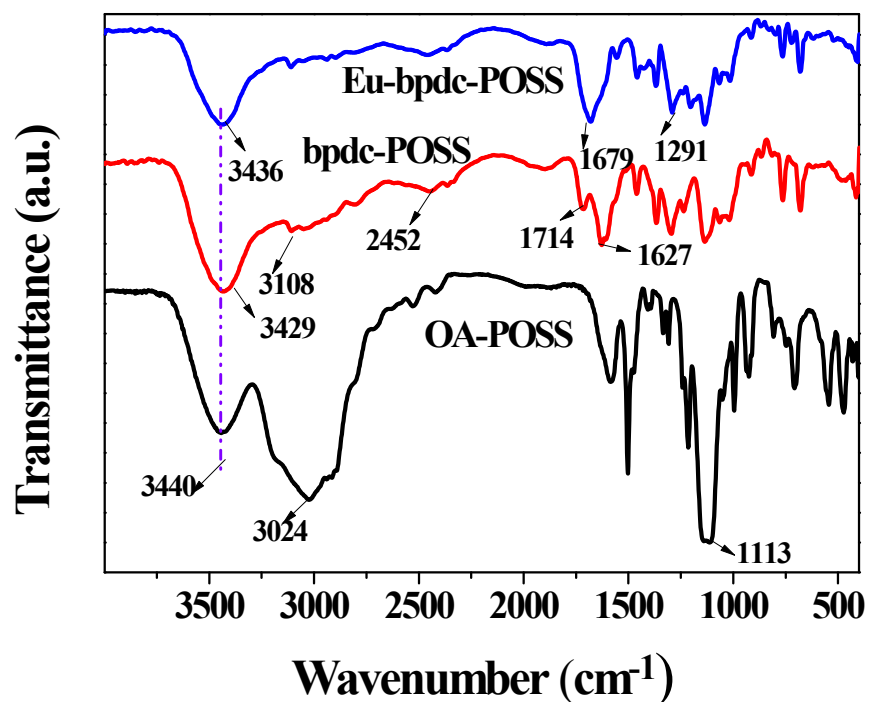

Fig. S1 FT-IR spectra of OA-POSS, bpdc-POSS, and Eu-bpdc-POSS.

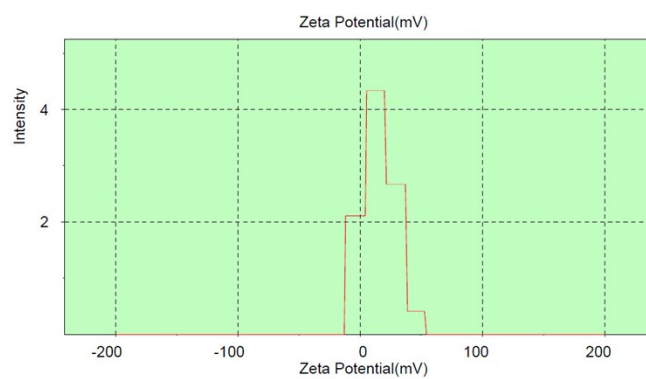

(a) OA-POSS

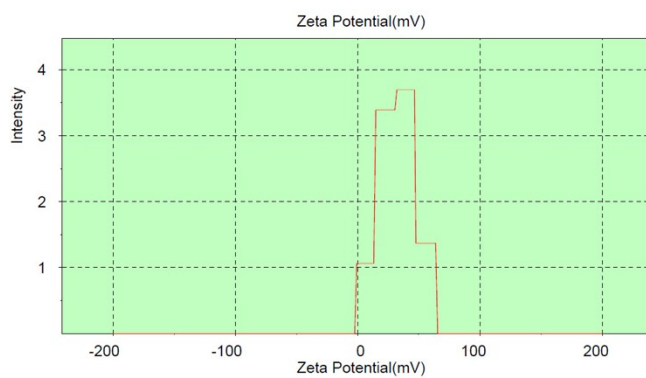

(b) bpdC-POSS

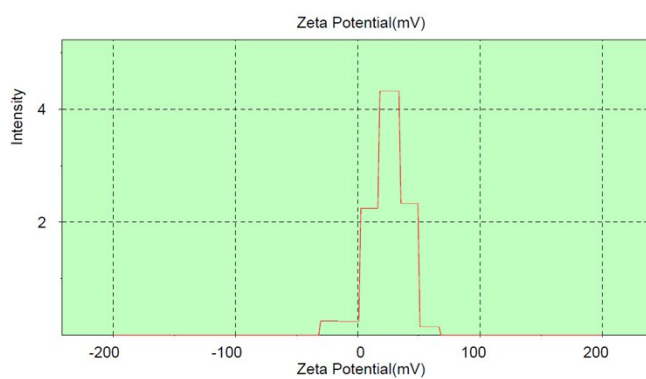

(c) Eu-bpdC-POSS

**Fig. S2** The ZETA potential charge of OA-POSS (a), bpdC-POSS (b) and Eu-bpdC-POSS (c).

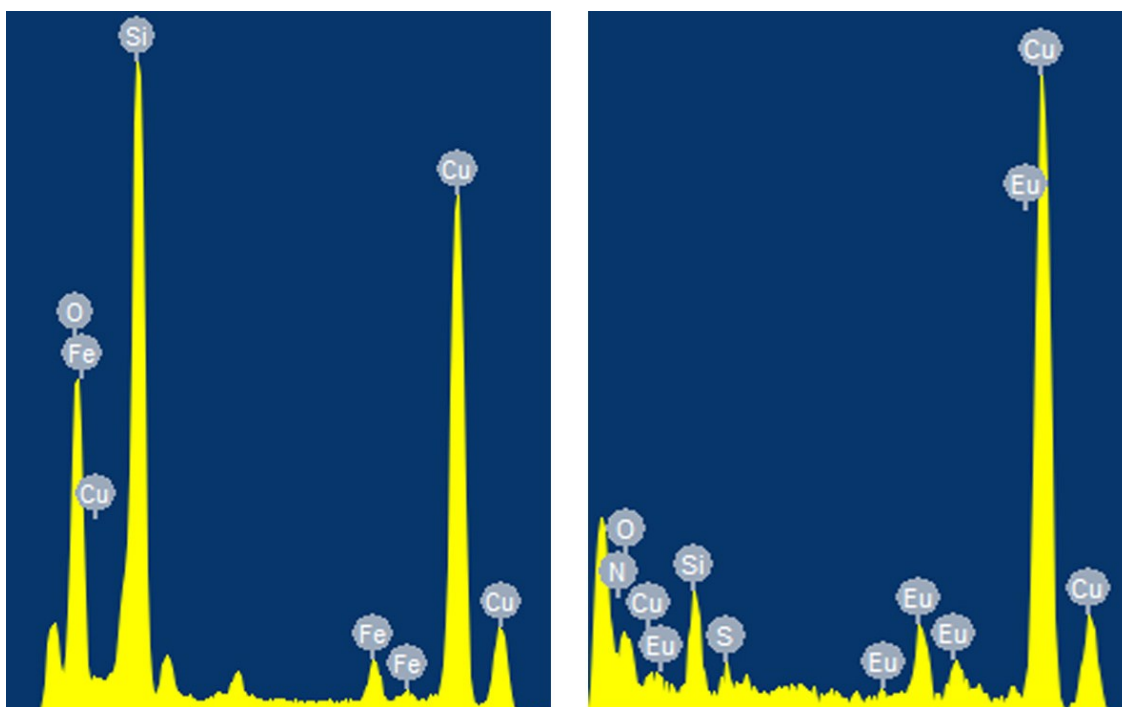

**Fig. S3** EDX spectra of OA-POSS (left) and Eu-bpdc-POSS (right).

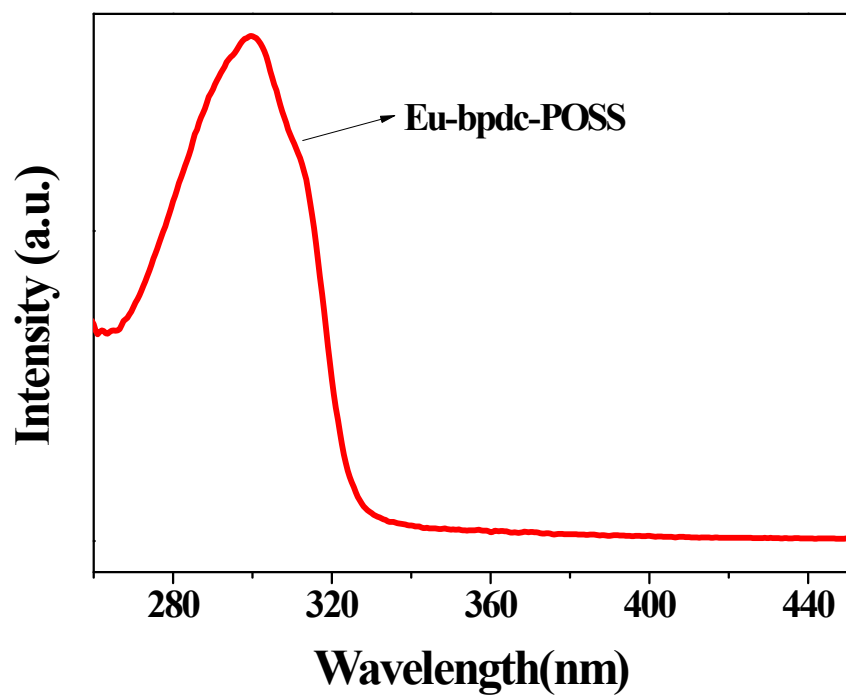

**Fig. S4** The UV-Vis absorption spectrum of Eu-bpdc-POSS (in DMSO).

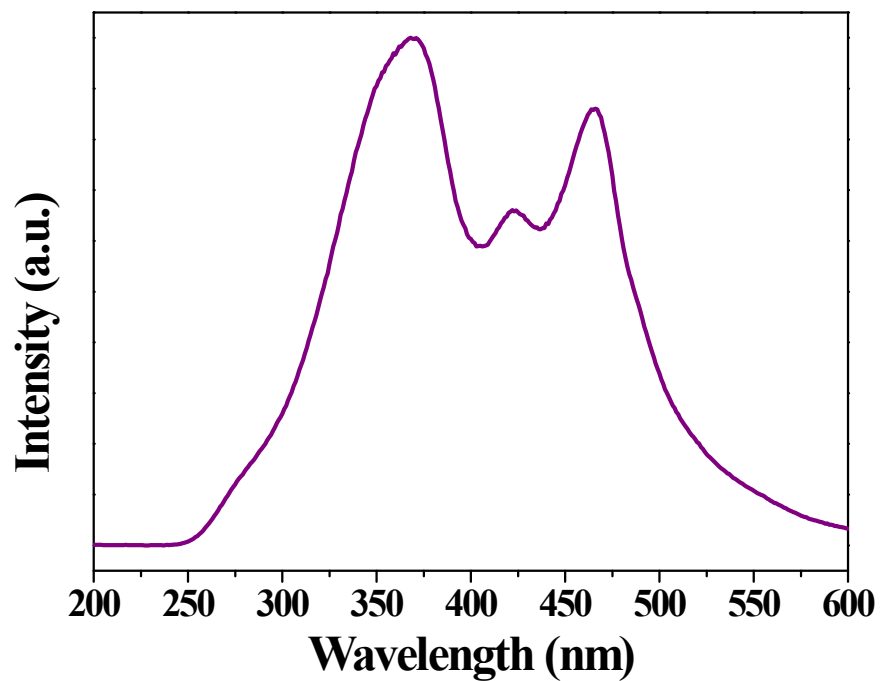

**Fig. S5** The excitation spectrum of Yb-bpdc-POSS material ( $\lambda_{\text{ex}} = 976$  nm).

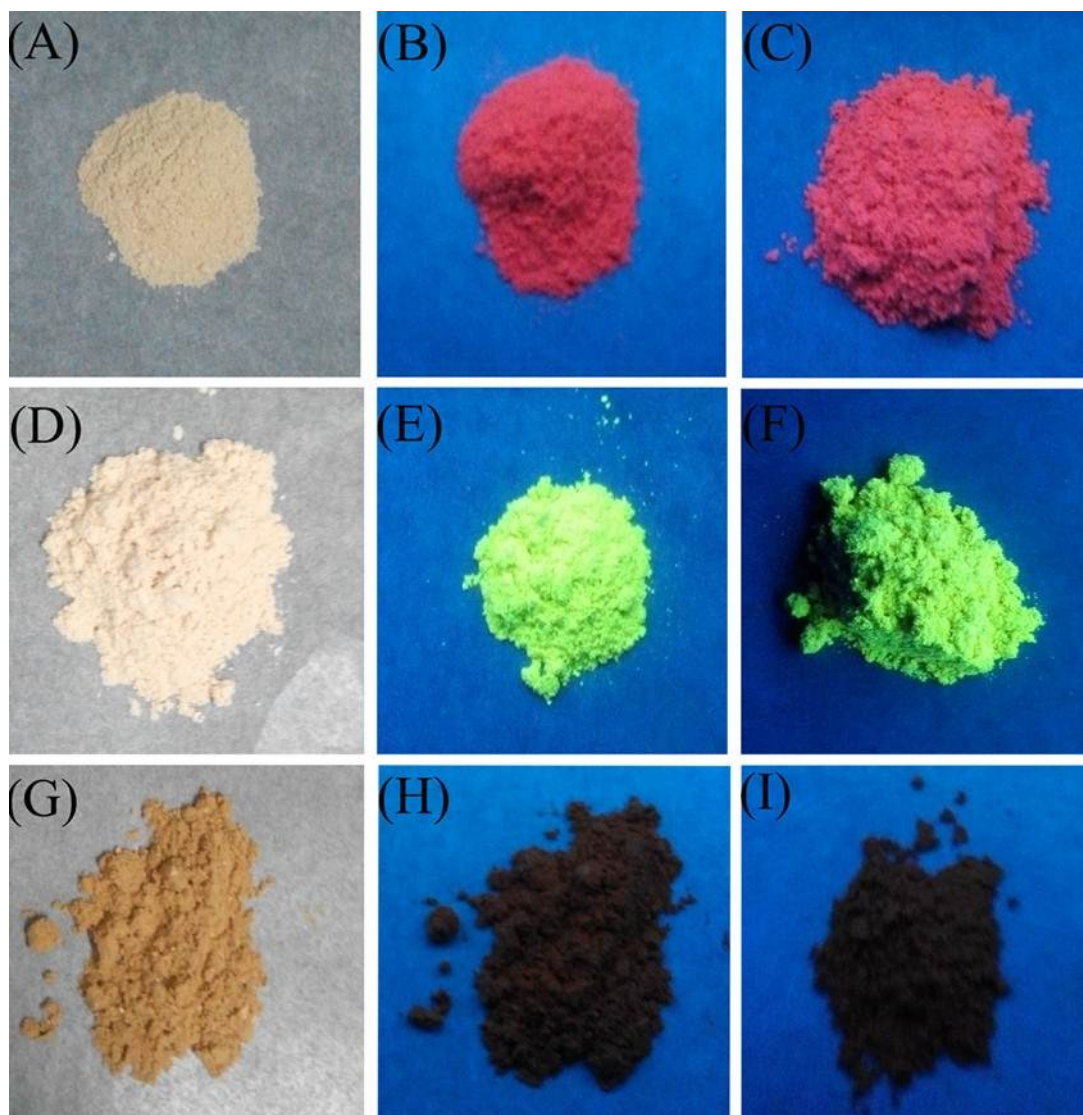

**Fig. S6** The digital photographs of Eu-bpdc-POSS (A, B, and C), Tb-bpdc-POSS (D, E, and F) and Sm-bpdc-POSS (G, H, and I), taken under the natural light (A, D, G) and UV light ( $\lambda_{\max} = 254$  nm) after one week (B, E, H) and three months (C, F, I), respectively.
